# Supplementary material
Source: publisher figshare collection journal article supplement (https://geolsoc.figshare.com/ndownloader/files/5425610)
Supplement: Supplementary file 1 [file 5425610]

Table 9. Results of laser fusion 40Ar/39Ar dating of anorthoclase crystals from three pumice clasts, Morte Tuff, Okote Member, Koobi Fora Formation. Area 119, photolocation 1540-178-115, Koobi Fora, northern Kenya
Sample	36Ar/39Ar	37Ar/39Ar	40Ar/39Ar	K/Ca	40Ar*/39ArK	% 40Ar*	39Ar	Calculated age
	x 10-4	x 10-3			± c.v.		10-15 mol	Ma ± 1 s.d.
83-262(A) anorthoclase; J = 3.966E-4 ± 0.30%; level 9, ANU63
1	3.869	1.618	2.227	325	2.082 ± 0.72%	93.5	8.6	1.489 ± 0.012
2	6.568	1.432	2.312	368	2.088 ± 1.16%	90.3	6.1	1.493 ± 0.018
4	5.145	2.229	2.308	236	2.126 ± 0.48%	92.1	6.5	1.520 ± 0.009
5	3.12	1.711	2.272	308	2.149 ± 0.66%	94.6	5.8	1.537 ± 0.011
6	2.948	3.557	2.233	148	2.116 ± 0.45%	94.8	7.8	1.514 ± 0.008
7	2.684	2.125	2.19	248	2.080 ± 0.54%	95	4.7	1.488 ± 0.009
8	5.201	2.007	2.279	262	2.095 ± 0.62%	91.9	6.1	1.499 ± 0.010
9	1.729	7.838	2.213	67	2.132 ± 0.89%	96.4	3.9	1.525 ± 0.014
10	2.681	1.992	2.21	264	2.101 ± 0.41%	95	6.1	1.503 ± 0.008
11	3.932	2.008	2.264	262	2.117 ± 1.14%	93.5	6.3	1.514 ± 0.018
12	3.275	0.672	2.217	783	2.090 ± 1.14%	94.3	6.3	1.495 ± 0.018
13	2.366	3.571	2.194	147	2.094 ± 0.66%	95.4	6	1.498 ± 0.011
14	6.265	1.009	2.371	522	2.156 ± 0.45%	90.9	5.4	1.542 ± 0.008
16	8.426	1.327	2.379	397	2.100 ± 0.48%	88.2	6.1	1.502 ± 0.008
	Arithmetic mean K/Ca (n = 14)			310 ± 177	Arithmetic mean age (n = 14)			1.509 ± 0.017
					Weighted mean age (n = 14)			1.510 ± 0.005
83-262(B) anorthoclase; J = 3.982E-4 ± 0.30%; level 10, ANU63
[1	0.453	1.337	2.206	394	2.163 ± 0.36%	98	7.9	1.553 ± 0.007]
2	1.483	2.138	2.166	246	2.092 ± 0.24%	96.6	19.1	1.502 ± 0.006
3	2.158	2.156	2.187	244	2.093 ± 1.41%	95.7	5.6	1.503 ± 0.021
4	1.619	1.436	2.174	367	2.096 ± 0.75%	96.4	6.9	1.505 ± 0.012
5	3.101	1.846	2.245	285	2.124 ± 0.57%	94.6	8.5	1.525 ± 0.010
6	9.479	2.252	2.426	234	2.116 ± 0.47%	87.2	6.1	1.519 ± 0.008
7	2.783	1.873	2.234	281	2.121 ± 0.43%	95	9.1	1.523 ± 0.008
8	5.888	6.321	2.317	83	2.113 ± 0.68%	91.2	6.3	1.517 ± 0.011
9	4.812	12.707	2.3	41	2.128 ± 0.50%	92.6	7.3	1.528 ± 0.009
10	3.436	2.12	2.264	248	2.132 ± 0.60%	94.2	5.6	1.531 ± 0.010
11	2.651	7.303	2.216	72	2.108 ± 0.48%	95.1	7.4	1.514 ± 0.008
12	2.1	1.378	2.19	382	2.097 ± 1.03%	95.8	6.4	1.506 ± 0.016
	Arithmetic mean K/Ca (n = 12)			240 ± 119	Arithmetic mean age (n = 11)			1.516 ± 0.011
					Weighted mean age (n = 11)			1.514 ± 0.005
83-262 anorthoclase; J = 5.215E-4 ± 0.30%; level 4, ANU48
1	81.695	4.723	4.09	111	1.628 ± 1.39%	39.8	10.4	1.531 ± 0.022
2	3.089	31.146	1.722	17	1.586 ± 1.56%	92.1	8	1.492 ± 0.024
3	1.209	13	1.684	40	1.602 ± 0.32%	95.1	14.4	1.506 ± 0.007
4	2.104	0.675	1.711	779	1.601 ± 0.34%	93.6	18.3	1.506 ± 0.007
5	2.947	-	1.735	-	1.600 ± 0.59%	92.2	16.1	1.505 ± 0.010
6	2.138	1.314	1.743	401	1.632 ± 1.36%	93.6	4.6	1.534 ± 0.021
7	1.319	46.347	1.696	11	1.614 ± 1.37%	95.1	4.6	1.518 ± 0.021
8	5.55	16.563	1.792	32	1.582 ± 0.35%	88.3	6.2	1.488 ± 0.007
9	2.068	11.467	1.689	46	1.581 ± 0.36%	93.6	7.3	1.487 ± 0.007
10	2.852	2.378	1.715	221	1.583 ± 0.23%	92.3	8.8	1.488 ± 0.006
11	3.77	16.323	1.743	32	1.586 ± 0.45%	90.9	5	1.491 ± 0.008
12	2.159	9.203	1.702	57	1.591 ± 0.27%	93.5	7.2	1.496 ± 0.006
	Arithmetic mean K/Ca (n = 11)			159 ± 237	Arithmetic mean age (n = 12)			1.503 ± 0.017
					Weighted mean age (N = 12)			1.495 ± 0.005
l = 5.543 x 10-10 a-1	Sensitivity ~2.6 x 10-17 mol/mV	Bracketed results excluded from mean age calculation
(36Ar/37Ar)Ca = 3.50 x 10-4	(39Ar/37Ar)Ca = 7.86 x 10-4	(40Ar/39Ar)K = 0.0304 for 83-262A, B; 0.0481 for 83-262
40Ar* – radiogenic 40Ar	39ArK – K-derived 39Ar	Quoted error in each age includes estimated error in J
Mass of alkali feldspar in the range 1 to 2 mg per analysis. Multiple crystals (up to 3) utilized for analyses 10-16 on 83-262(A) and for all analyses except 1 and 2 for 83-262(B); all single crystals for 83-262, mass 0.8 to 3.3 mg
Irradiated for 24 hours in X33 or X34, HIFAR nuclear reactor
Fluence monitor: 92-176 sanidine from Fish Canyon Tuff; K-Ar reference age: 28.1 Ma
